# Supplementary material for: FIONA1‐Mediated m6A Modification Regulates the Floral Transition in Arabidopsis
Source: PubMed Central journal article supplement (PMC8867147; doi:10.1002/advs.202103628), 2022-01-05
Supplement: ADVS-9-2103628-s002.pdf [file ADVS-9-2103628-s002.pdf]

## Supporting Information

for *Adv. Sci.*, DOI: 10.1002/adv.202103628

### FIONA1-Mediated m<sup>6</sup>A Modification Regulates the Floral Transition in *Arabidopsis*

*Tao Xu, Xiaowei Wu, Chui Eng Wong, Sheng Fan, Yu Zhang, Songyao  
Zhang, Zhe Liang, Hao Yu<sup>\*</sup>, and Lisha Shen<sup>\*</sup>*

## Supporting Information

### **FIONA1-Mediated m<sup>6</sup>A Modification Regulates the Floral Transition in *Arabidopsis***

*Tao Xu, Xiaowei Wu, Chui Eng Wong, Sheng Fan, Yu Zhang, Songyao Zhang, Zhe Liang, Hao Yu<sup>\*</sup>, and Lisha Shen<sup>\*</sup>*

```

Arabidopsis 1 -----MRSQKRRRSE-PGSTKQPRSKSDNPPDFASLASIVYSGKPFVFSG--SRARIDVTDVNTRELTRELL
Spikemoss 1 -----MKRRKSTHPRNRVARGSDPFAALAAVAGARVVRINPSSGAGSDVDRDPAATRELTRELL
Wheat 1 -----MGQGRKRRRDGPDAPVVMHPRNRVAAAAPPFAALASIVYSGKPFVFSG--GRASVDTPFAATRELTRELL
Rice 1 -----MGQGRKRRRDGSEAF-ALHPRNRVAAAAPPFAALASIVYSGKPFVFSG--GRASVDTPFAATRELTRELL
Soybean 1 -----MSRRNGKRRRSETPGSTAHPRNRVSDNPPDFASLASIVYSGKPFVFSG--SBRIDVTDVNTRELTRELL
Cabbage 1 -----MVRTKGNQKIVGMHPRNVLRTPQ-DVTKHATKVKDPRQCCQLELN-GKVSVNRERKTLRELTRELL
Drosophila 1 -----MALSRS-----MHARNRWKDKPDEAVLASKVYDFKHOIQINLN-GRVSNRKRPPFVRLTCTLL
Mouse 1 -----MALSRS-----MHARNRWKDKPDEAVLASKVYDFKHOIQINLN-GRVSNRKRPPFVRLTCTLL
Human 1 -----MALSRS-----MHARNRWKDKPDEAVLASKVYDFKHOIQINLN-GRVSNRKRPPFVRLTCTLL
Red algae 1 -----MFYAKTFNGGQDQGLAHLDDELAQRKGR-----LDRKESVCSGKRAIF
Green algae 1 MKRRPTLSLSAKQIREVLHALDSDTTEFAELAASEDLDAALWYSLYRFRDCKDIRQSSDARGDARRAAGIARMAHFRNVFANKADEFVLDGKROCPKRFVQCSL-GLWYVNRKSEVETRAVNSAII
C.elegans 1 -----MSQNMHPRNRVPRKPKPDEKALVYVYSGKPFVFSG--GKVTDFDKDAVRLTCTLL
Yeast 1 -----MFIYILERSVKNRGRDDEWNEDELPTGKALIF-----
E.coli 1 -----MSAQKFGHPRNRHHSRYDPLATLQVNPBRLCRPHLTPA-GRQSVDEANPLAVRAKRAII

Arabidopsis 69 LHDHGVN-WMFPDGOCTVFNRSNYIHWINDLSS-GIQLSGDGSKVMQFDICGANCIPYLLGASLHWGVSFVGSDDTVVALEWAKNVQSNPHFSQLETRDS---KVPP--QCSSVPEVENTER
Spikemoss 62 DCDYGLG-WMFPDGOCTVFNRSNYIHWINDLSS-GLIQLSGDGSKVMQFDICGANCIPYLLGASLHWGVSFVGSDDTVVALEWAKNVQSNPHFSQLETRDSAAK-----
Wheat 73 LHDHGVN-WMFPDGOCTVFNRSNYIHWINDLSS-DLIPFSSSNTVRFDDICGANCIPYLLGASLHWGVSFVGSDDTVVALEWAKNVQSNPHFSQLETRDSNANAP-----
Rice 72 LHDHGVN-WMFPDGOCTVFNRSNYIHWINDLSS-DLIPFSSSNTVRFDDICGANCIPYLLGASLHWGVSFVGSDDTVVALEWAKNVQSNPHFSQLETRDSNANAP-----
Soybean 68 HHRHAIW-WMFPDGOCTVFNRSNYIHWINDLSS-NIIRNVTSSDQKPRFDICGANCIPYLLGASLHWGVSFVGSDDTVVALEWAKNVQSNPHFSQLETRDSKV---QDNASAPCVESVETGDR
Cabbage 74 LHDHGS-WMFPDGOCTVFNRSNYIHWINDLSS-QIIPSRGN-NKVGQFDICGANCIPYLLGASLHWGVSFVGSDDTVVALEWAKNVQSNPHFSQLETRDS---RIIP--SED
Drosophila 66 KEYVDLD-VDFAPGSIPTVPLAARLNYIHWINDLSS---PFLNLQ---IRGDDICGSSCTVGLLAKRKNHRLALSKPQNIHPRVAKNRKRNHESLDEVAQV-----
Mouse 61 RSDPGLS-IDPLELR-IPVPLAARLNYIHWINDLSS---HQDSKSTLRRDIDICGANCIPYLLGASLHWGVSFVGSDDTVVALEWAKNVQSNPHFSQLETRDSKV---RIIP--SED
Human 61 RSDPGLS-IDPLELR-IPVPLAARLNYIHWINDLSS---HQDSKSTLRRDIDICGANCIPYLLGASLHWGVSFVGSDDTVVALEWAKNVQSNPHFSQLETRDSKV---RIIP--SED
Red algae 51 QDEEGLR-MSIPFGLCPAPSRRLRYIHWINDLSS---PEQDLQL-IRGDDICGANCIPYLLGASLHWGVSFVGSDDTVVALEWAKNVQSNPHFSQLETRDSKV---RIIP--SED
Green algae 130 VDVGIVGSDVDFAPGSIPTVPLAARLNYIHWINDLSS-HQDSKSTLRRDIDICGANCIPYLLGASLHWGVSFVGSDDTVVALEWAKNVQSNPHFSQLETRDSKV---RIIP--SED
C.elegans 61 KRDYDLD-VDFAPGSIPTVPLAARLNYIHWINDLSS---NKLTKNVDICGANCIPYLLGASLHWGVSFVGSDDTVVALEWAKNVQSNPHFSQLETRDSKV---RIIP--SED
Yeast 33 DRDYGSD-VDFAPGSIPTVPLAARLNYIHWINDLSS---PSQDKKRLTIDICGANCIPYLLGASLHWGVSFVGSDDTVVALEWAKNVQSNPHFSQLETRDSKV---RIIP--SED
E.coli 61 AEFYAVANADDFDGFVCFVPEERADYIHWINDLSS---ASGTIPANASLIDICGANCIPYLLGASLHWGVSFVGSDDTVVALEWAKNVQSNPHFSQLETRDSKV---RIIP--SED

Arabidopsis 191 EKTQEAEIATVTKSD--YHDKSFIKPAVILQVVKENPFDKCMSPFFPEFPE-----EAGQ-----NPRFSCGGPPEMVCVCGEAFVRIIRKDSAVLQR-----
Spikemoss 169 -----NGGDQENHRLVQVWDEBPPFSCMNPFFPEFPE-----EAGQ-----NPRFACGGPPEMVCVCGEAGVFRVIRHBSMDLQTK-----
Wheat 182 CSKSETVAEVAEAVENIPEPVDVSVRAIPIVQVWDEBPPFSCMNPFFPEFPE-----EAGQ-----NPRFSCGGPPEMVCVCGEAFVRIIRKDSAVLQR-----
Rice 181 CSSESAVDGEAARENTSKPVGVLRKSPITLQVWDEBPPFSCMNPFFPEFPE-----EAGQ-----NPRFSCGGPPEMVCVCGEAFVRIIRKDSAVLQR-----
Soybean 192 ITCRSTVVAEPLDLDLHCKNRNYHGPPITLQVWDEBPPFSCMNPFFPEFPE-----EAGQ-----NPRFSCGGPPEMVCVCGEAFVRIIRKDSAVLQR-----
Cabbage 185 -----DVTMVLQVWDEBPPFSCMNPFFPEFPE-----EAGQ-----NPRFSCGGPPEMVCVCGEAFVRIIRKDSAVLQR-----
Drosophila 163 -----PDNTNPKSFFQDQQLQYFCMNPFFPEFPE-----EAGQ-----NPRFSCGGPPEMVCVCGEAFVRIIRKDSAVLQR-----
Mouse 161 -----PQKTLMDAKKEESE-IVDFCMNPFFPEFPE-----EAGQ-----NPRFSCGGPPEMVCVCGEAFVRIIRKDSAVLQR-----
Human 161 -----PQKTLMDAKKEESE-IVDFCMNPFFPEFPE-----EAGQ-----NPRFSCGGPPEMVCVCGEAFVRIIRKDSAVLQR-----
Red algae 150 -----SQGELLHGVKRTDT---PFFVCMNPFFPEFPE-----EAGQ-----NPRFSCGGPPEMVCVCGEAFVRIIRKDSAVLQR-----
Green algae 165 -----SOTLHMRRNSAVLAQMGQEPFSCMNPFFPEFPE-----EAGQ-----NPRFSCGGPPEMVCVCGEAFVRIIRKDSAVLQR-----
C.elegans 160 -----PDVKTVMVDVNIPTDTPYAFKCMNPFFPEFPE-----EAGQ-----NPRFSCGGPPEMVCVCGEAFVRIIRKDSAVLQR-----
Yeast 135 -----KQDCVDPDTEGMBEPEFVCMNPFFPEFPE-----EAGQ-----NPRFSCGGPPEMVCVCGEAFVRIIRKDSAVLQR-----
E.coli 163 -----KESGALFNGLTHKNRQVDFALQVWDEBPPFSCMNPFFPEFPE-----EAGQ-----NPRFSCGGPPEMVCVCGEAFVRIIRKDSAVLQR-----

Arabidopsis 285 -----FRNYTSMGKKANLRLDLSKLMWVGVVIVNVTFFVQGGQSRWGLAWSMPPIARKLIAP-----PVVKSVLISMLELKKRQYSVVDVQSVREF
Spikemoss 246 -----IHWYTSMGKSSLRALKAEKRGCG-AMVVTFFVQGGQSRWGLAWSSSAGAVKSGSQRGRCFTGTSSSGSRFVLEGGDRKRSALVVDGLGRH
Wheat 278 -----FRNYTSMGKKANLRLDLSKLMWVGVVIVNVTFFVQGGQSRWGLAWSMPPIARKLIAP-----PVVKSVLISMLELKKRQYSVVDVQSVREF
Rice 277 -----FRNYTSMGKKANLRLDLSKLMWVGVVIVNVTFFVQGGQSRWGLAWSMPPIARKLIAP-----PVVKSVLISMLELKKRQYSVVDVQSVREF
Soybean 288 -----FRNYTSMGKKANLRLDLSKLMWVGVVIVNVTFFVQGGQSRWGLAWSMPPIARKLIAP-----PVVKSVLISMLELKKRQYSVVDVQSVREF
Cabbage 255 -----FRNYTSMGKKANLRLDLSKLMWVGVVIVNVTFFVQGGQSRWGLAWSMPPIARKLIAP-----PVVKSVLISMLELKKRQYSVVDVQSVREF
Drosophila 250 -----IFVTMMGKRVANVRELDYIKMLKQV-VANVSTFFVQGGQSRWGLAWSMPPIARKLIAP-----PVVKSVLISMLELKKRQYSVVDVQSVREF
Mouse 243 -----KMYSCMDGKSSLRALKAEKRGCG-AMVVTFFVQGGQSRWGLAWSMPPIARKLIAP-----PVVKSVLISMLELKKRQYSVVDVQSVREF
Human 244 -----KMYSCMDGKSSLRALKAEKRGCG-AMVVTFFVQGGQSRWGLAWSMPPIARKLIAP-----PVVKSVLISMLELKKRQYSVVDVQSVREF
Red algae 222 -----WFSFSGKSKDGLIORYTOQNI-TEEVNRGKSGRWLAWSKSHGALVTE-----LPRKNSRSMGQGRRETRFQVSKSSEF
Green algae 315 -----VHWYTMGCKKSLRDLRCLDMAK-VPAIRLARELQGGVVRWQVAVSQAQALPISITPLRSGVDKDPDTPHRSKCRWTEPEQAVGEGSLAKL
C.elegans 255 -----IKHYTMGCKKSLRDLRCLDMAK-VPAIRLARELQGGVVRWQVAVSQAQALPISITPLRSGVDKDPDTPHRSKCRWTEPEQAVGEGSLAKL
Yeast 209 -----NYTCMPGKSSVPAVVKRNRORFQDDVKMLISVNLGKRRWLAWEKSKVSVLTIDRPSIFQCKPKGLTRLMQESILNLRQEDTDAIVAEF
E.coli 247 -----VMFSLVSRGSENPVYRKAITDVG-AVKVYKRMADGQRQSRFLAWDMMNDEQRRRFLVNRQ-----

Arabidopsis 374 FKSCGASCKLNSSTFVSDIVASNDQCNTISKNDIADVDSVRSYGKQLSDGSSLQVPSYNSLFRLLVFOQMPGGLLTKGSLQKQDPSLGLSFRVFSGLSEESLKSFCRLTLRGIHRAKLDYPKVVKKE
Spikemoss 342 LEARGVACIDIASFAITGPPGQREG-----FDORNSDGSFPAKTLFQOSGCGLLVKIWIKAGRSSLSLVSALSESSESLRKLKLSVST-----
Wheat 339 FCTSNLCKTSLRFSIDVLDPEQATLDCDPLGSGVDEDS-----TKLHSIVTGSFRFVQGGQSRWGLAWSMPPIARKLIAP-----PVVKSVLISMLELKKRQYSVVDVQSVREF
Rice 366 FHAGNLSCKTSSLSFSDVLSDEQAQAMLHDE--SGSVGMS-----TKLHSIVTGSFRFVQGGQSRWGLAWSMPPIARKLIAP-----PVVKSVLISMLELKKRQYSVVDVQSVREF
Soybean 376 FSSHGLFCLTNSSTFVSDIVASNDQCNTISKNDIADVDSVRSYGKQLSDGSSLQVPSYNSLFRLLVFOQMPGGLLTKGSLQKQDPSLGLSFRVFSGLSEESLKSFCRLTLRGIHRAKLDYPKVVKKE
Cabbage 346 FKSSDASSKLSNNTFVSDIVASSEQNTITNR--DDVDSVRSYGKQLSDGSSLQVPSYNSLFRLLVFOQMPGGLLTKGSLQKQDPSLGLSFRVFSGLSEESLKSFCRLTLRGIHRAKLDYPKVVKKE
Drosophila 338 -----KMYSCMDGKSSLRALKAEKRGCG-AMVVTFFVQGGQSRWGLAWSMPPIARKLIAP-----PVVKSVLISMLELKKRQYSVVDVQSVREF
Mouse 338 -----KMYSCMDGKSSLRALKAEKRGCG-AMVVTFFVQGGQSRWGLAWSMPPIARKLIAP-----PVVKSVLISMLELKKRQYSVVDVQSVREF
Human 338 -----KMYSCMDGKSSLRALKAEKRGCG-AMVVTFFVQGGQSRWGLAWSMPPIARKLIAP-----PVVKSVLISMLELKKRQYSVVDVQSVREF
Red algae 411 AEQIRLVLEKCGCAISPSDRLQ-----TFNYRCVMEEYVFTVGSNRLLVKILQPLGAVVVVTAACDDKSATNLMQRRFLKVEAIKARISAOTRQVGSRVDS
Green algae 352 KCVTWTNQARKRAKALLESSESKKAKWFSNVACQVAFAGDGRDSDYTDAGNVSFSEIETNNLNAWDSAQYFPLPNEGVPPIRIRIQVSEDSYDIFELISGSKQLHQLVQYLNKILCR
C.elegans 297 LQKFLDDNKIWSKGSVLEISTKSTWS-----RKARRISKQTSVSESSGMCNCRNVDNGLQCKWIEGYDYNVVEFSCSALARALRDNKK
Yeast -----
E.coli -----

Arabidopsis 504 RERERVLHFT-----
Spikemoss -----
Wheat -----
Rice -----
Soybean -----
Cabbage -----
Drosophila -----
Mouse -----
Human -----
Red algae -----
Green algae -----
C.elegans -----
Yeast -----
E.coli -----

```

**Figure S1.** Sequence alignment of FIO1 and its homologs in other organisms. Conserved residues are shown in black, while similar residues are shown in grey. The highly conserved key catalytic residues NPPF were labeled with a red box. Amino acid sequences of *Arabidopsis* FIO1 (F4IGH3\_ARATH; *Arabidopsis thaliana*) and its homologs from various organisms, including Spikemoss (D8S370\_SELML, *Selaginella moellendorffii*), wheat (UPI0003D4495F, *Triticum aestivum*), rice (Q6YUR7\_ORYSJ, *Oryza sativa* subsp. *japonica*), soybean (I1K375\_SOYBN, *Glycine max*), Cabbage (M4ENF3\_BRARP, *Brassica rapa* subsp. *Pekinensis*), *Drosophila* (MET16\_DROME, *Drosophila melanogaster*), mouse (MET16\_MOUSE, *Mus musculus*), human (MET16\_HUMAN, *Homo sapiens*), Red algae (M2Y9P9\_GALSU, *Galdieria sulphuraria*), green algae (C1FD75\_MICCC, *Micromonas commode*), *C. elegans* (Q09357\_CAEEL, *Caenorhabditis elegans*), yeast (O42662\_SCHPO, *Schizosaccharomyces pombe*), and *E. coli* (RLMF\_ECOLI, *Escherichia coli*), are obtained from UniProt and aligned.

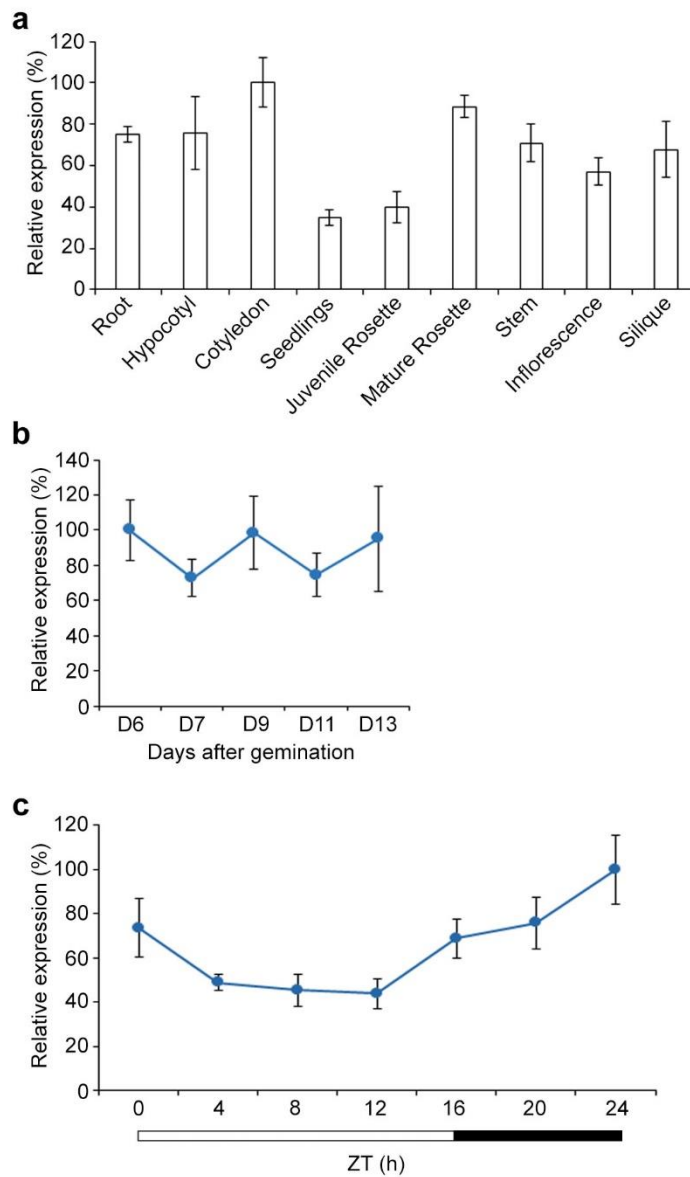

**Figure S2.** Expression pattern of *FIO1*. a) Expression pattern of *FIO1* in various *Arabidopsis* tissues. b) Temporal expression of *FIO1* during seedling development. Seedlings at different developmental stages grown under long days (LDs) were harvested for expression analysis. c) Expression of *FIO1* does not obviously oscillate within a 24-h cycle under LDs. Six-day-old seedlings grown under LDs were harvested at different time points expressed in hours as Zeitgeber time (ZT). *FIO1* expression (a-c) in wild-type Col plants was determined by quantitative real-time PCR analysis. Results were normalized against the expression levels of *TUB2* and the maximal expression level of *FIO1* in each panel was set as 100%. Error bars, mean  $\pm$  SD; n = 3 biological replicates.

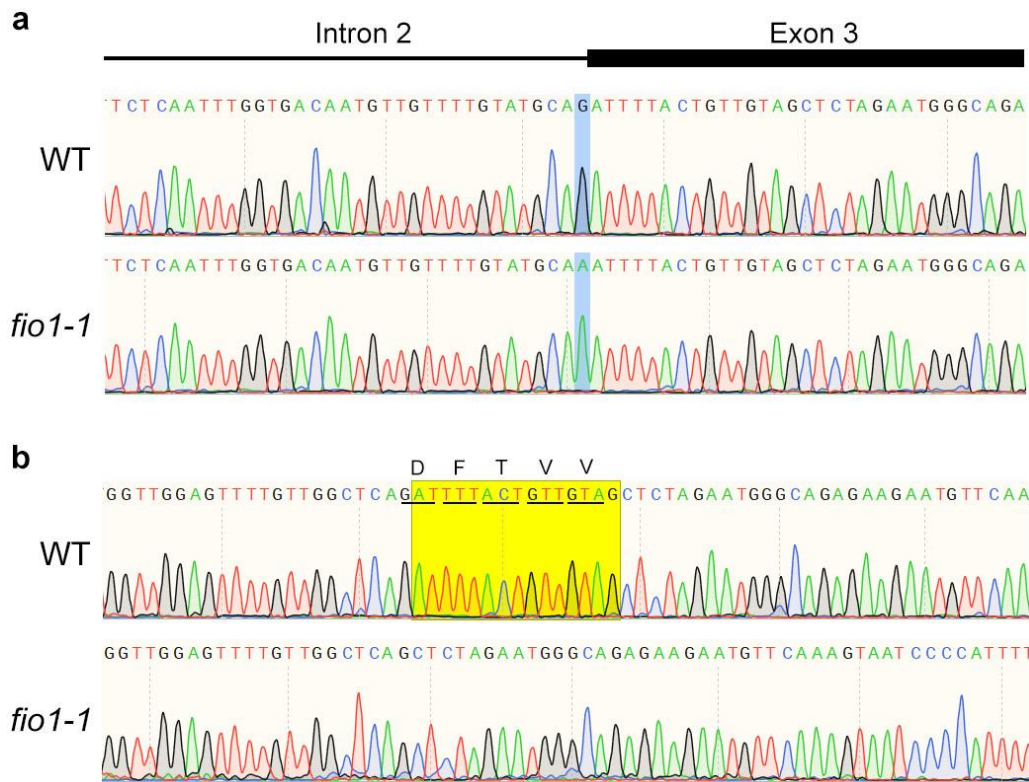

**Figure S3.** Sequencing of the *fio1-1* mutation site. a) Sequencing chromatographs showing the G to A (highlighted in blue) conversion in the splice acceptor site of the 2<sup>nd</sup> intron of the *FIO1* genomic sequence in *fio1-1*. b) Sequencing chromatographs showing a 15-bp deletion (highlighted in yellow) in the *fio1-1* cDNA sequence. This results in a 5 amino acid deletion (DFTVV) in the FIO1 protein sequence in *fio1-1*.

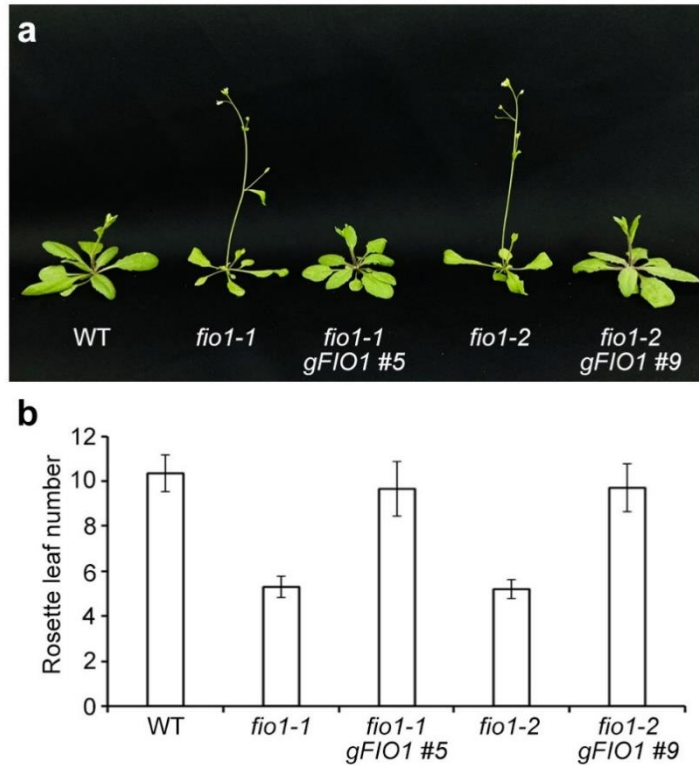

**Figure S4.** A genomic fragment of *FIO1* (*gFIO1*) fully complements the early-flowering phenotype of *fio1* mutants. a) Representative lines of *fio1-1 gFIO1* and *fio1-2 gFIO1* show comparable flowering time to a wild-type plant under LDs. b) Flowering time of representative lines of *fio1-1 gFIO1* and *fio1-2 gFIO1* under LDs. Error bars, mean  $\pm$  SD; n = 20.

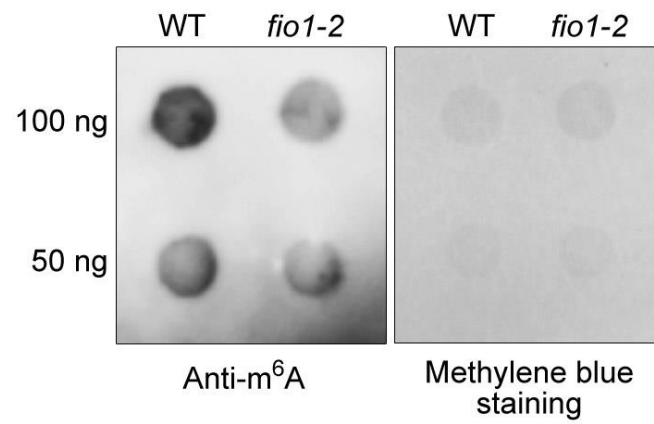

**Figure S5.** Dot blot analysis of m<sup>6</sup>A levels in total RNA isolated from 6-day-old wild-type and *fio1-2* seedlings. Methylene blue staining of the membrane serves as a loading control.

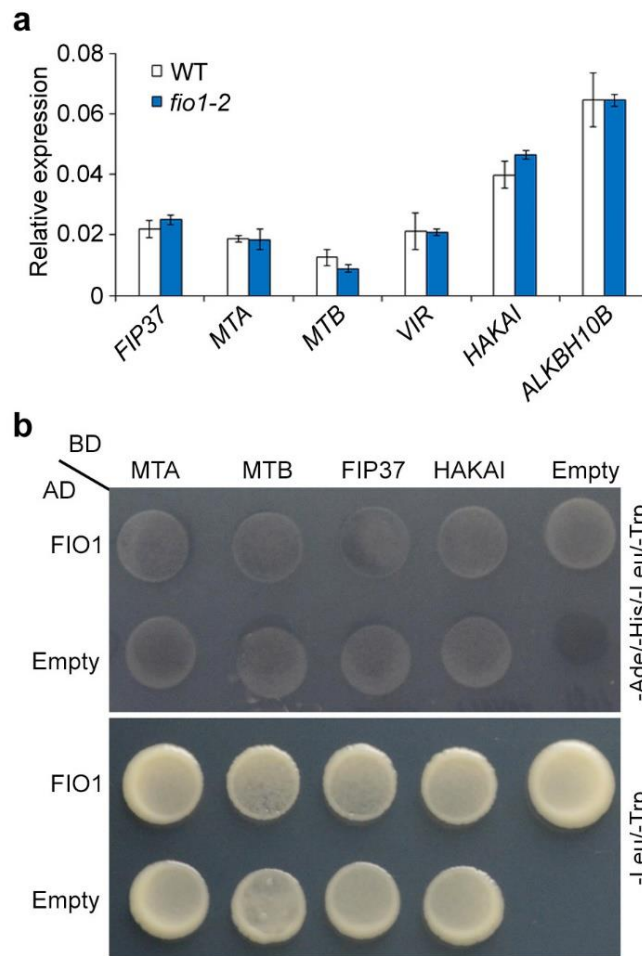

**Figure S6.** FIO1 may act independently of the other known m<sup>6</sup>A writers. a) Expression of the known m<sup>6</sup>A writer genes including *FIP37*, *MTA*, *MTB*, *VIR* and *HAKAI*, and the known m<sup>6</sup>A eraser gene *ALKBH10B* in 6-day-old wild-type and *fio1-2* seedlings under LDs determined by real-time PCR. Error bars, mean  $\pm$  SD; n = 3 biological replicates. b) Yeast two-hybrid indicates no direct interaction between FIO1 and known m<sup>6</sup>A writer proteins. Transformed yeast cells were grown on SD-Ade/-His/-Leu/-Trp and SD-Leu/-Trp mediums.



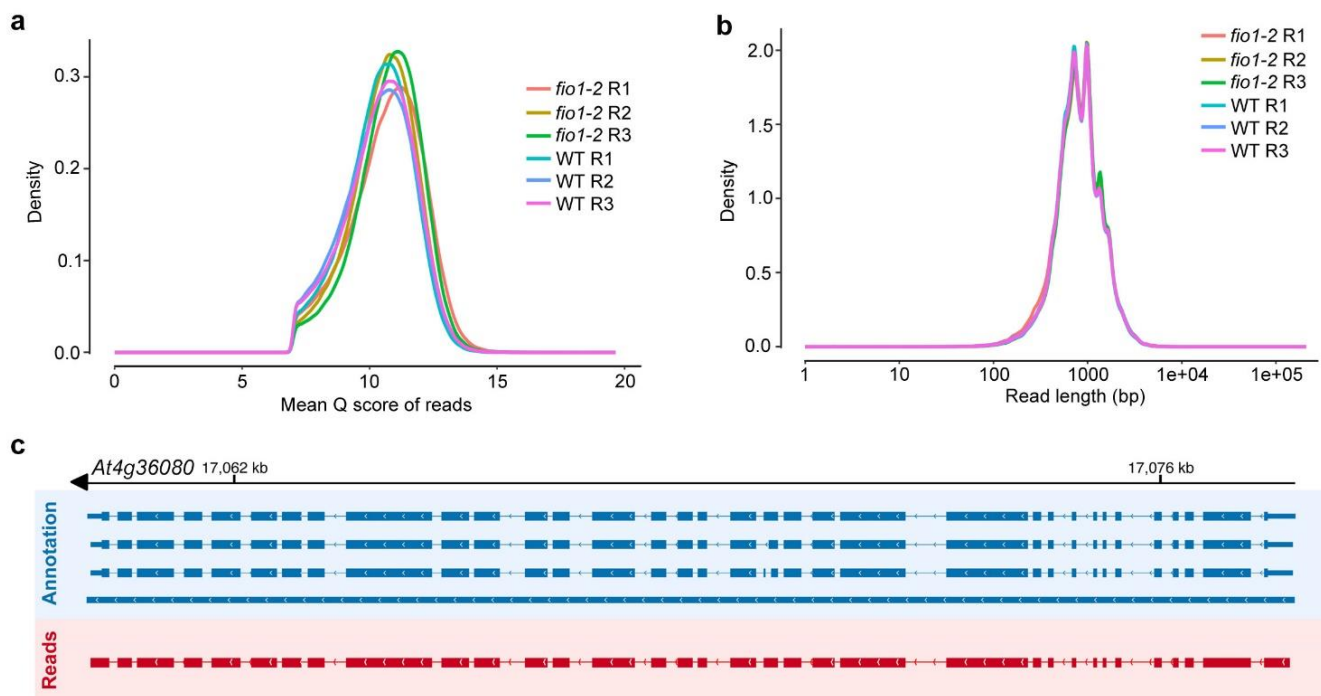

**Figure S7.** Analysis of nanopore reads. a) Distribution of Q scores of the nanopore reads. High-quality reads with Q score > 7 were used for further analysis. b) Distribution of continuous read length of the nanopore reads. c) An example of a long read of 11,624 nt from the *At4g36080* locus. The long nanopore reads (red color) was aligned well with the annotated locus (blue color) from TAIR ([www.arabidopsis.org](http://www.arabidopsis.org)).

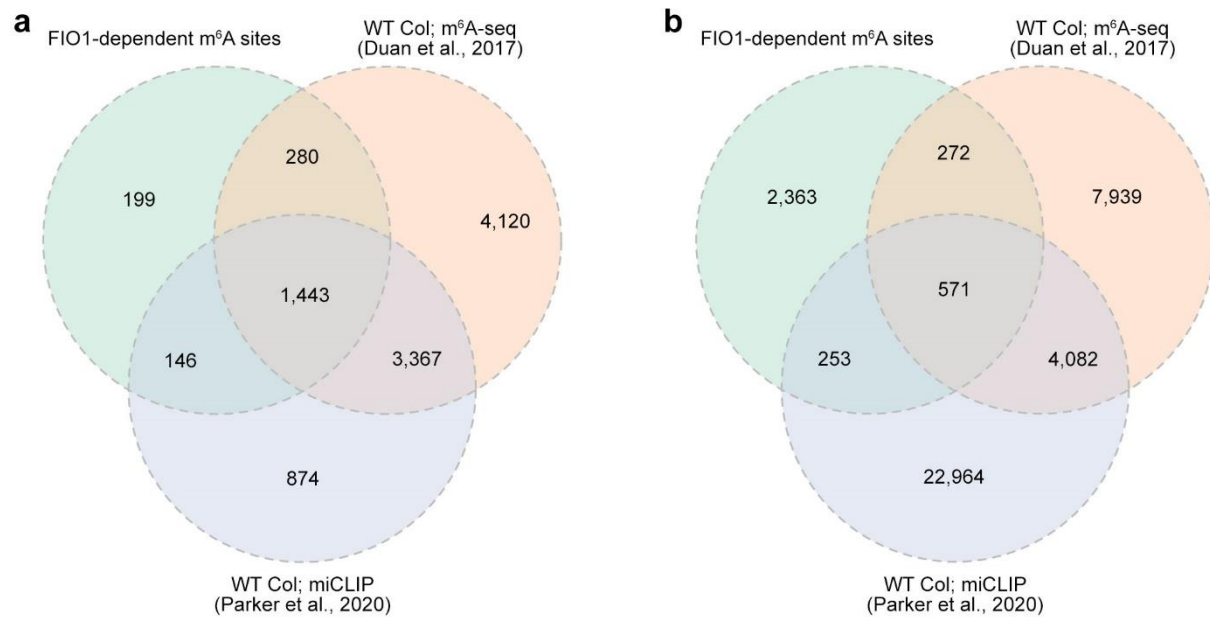

**Figure S8.** Comparison of FIO1-dependent m<sup>6</sup>A sites with those m<sup>6</sup>A sites revealed by m<sup>6</sup>A-seq and miCLIP on the transcript basis (a) and the m<sup>6</sup>A-site basis (b). The m<sup>6</sup>A-seq<sup>[21]</sup> and miCLIP<sup>[9]</sup> data obtained from 2-week-old seedlings were used for this comparison.

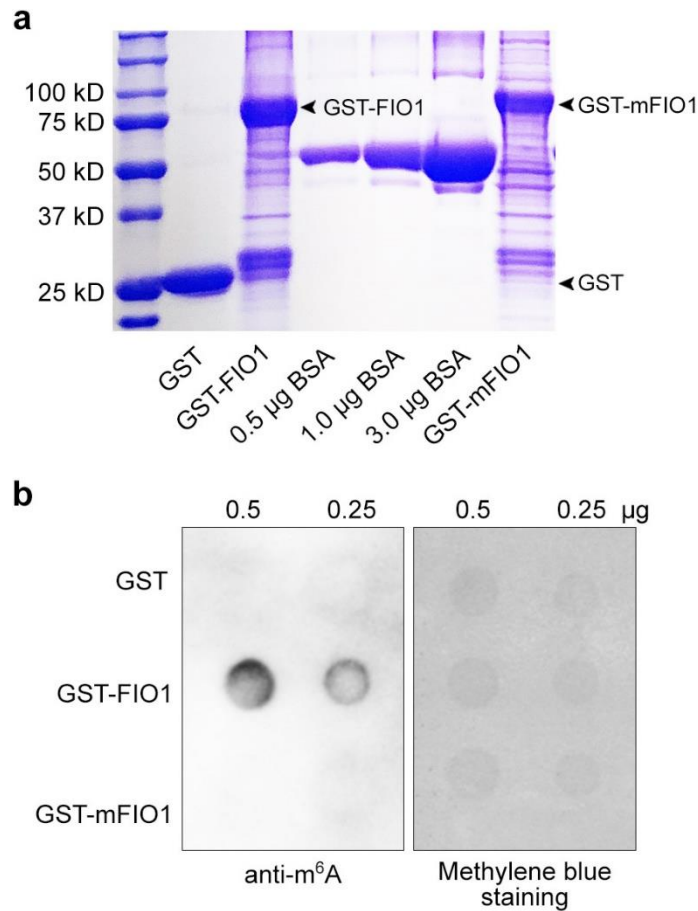

**Figure S9.** *In vitro* m<sup>6</sup>A methylation assay. a) Expression of recombinant GST-FIO1 and GST-mFIO1 proteins. Arrowheads indicate the expression of GST, GST-FIO1 and GST-mFIO1 recombinant proteins. The key catalytic residues “NPPF” were mutated to “NAAF” in GST-mFIO1. Different amounts of BSA protein were included as controls. b) Examination of m<sup>6</sup>A levels by dot blot analysis in RNA purified from the m<sup>6</sup>A methylation assay. RNA oligo (GCCAGAGCCAGAGCCAGAGCCAGA) containing four repeats of the consensus m<sup>6</sup>A motif recognized by FIO1 was incubated with GST, GST-FIO1 and GST-mFIO1, after which RNA was purified for examination of m<sup>6</sup>A levels by dot blot analysis. Methylene blue staining of the membrane serves as a loading control.

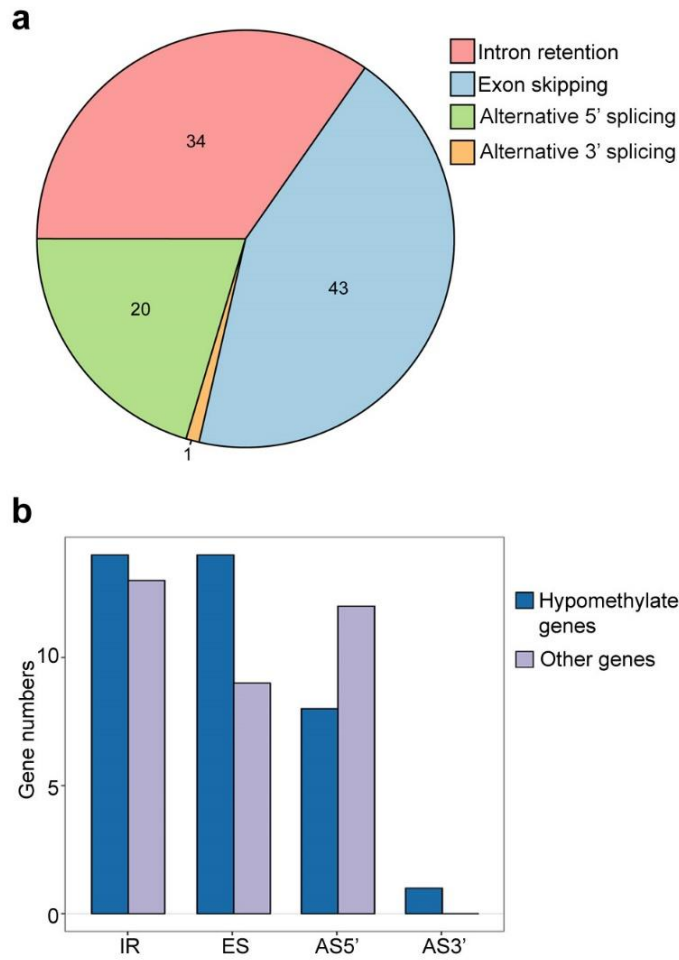

**Figure S10.** FIO1 does not greatly affect alternative splicing. a) Pie chart showing numbers of differential alternative splicing events in each category detected in *fio1-2* mutants. b) Comparison of numbers of hypomethylated genes and other genes with differential alternative splicing events. IR, intron retention; ES, exon skipping; AS5', alternative 5' splicing; AS3', alternative 3' splicing.

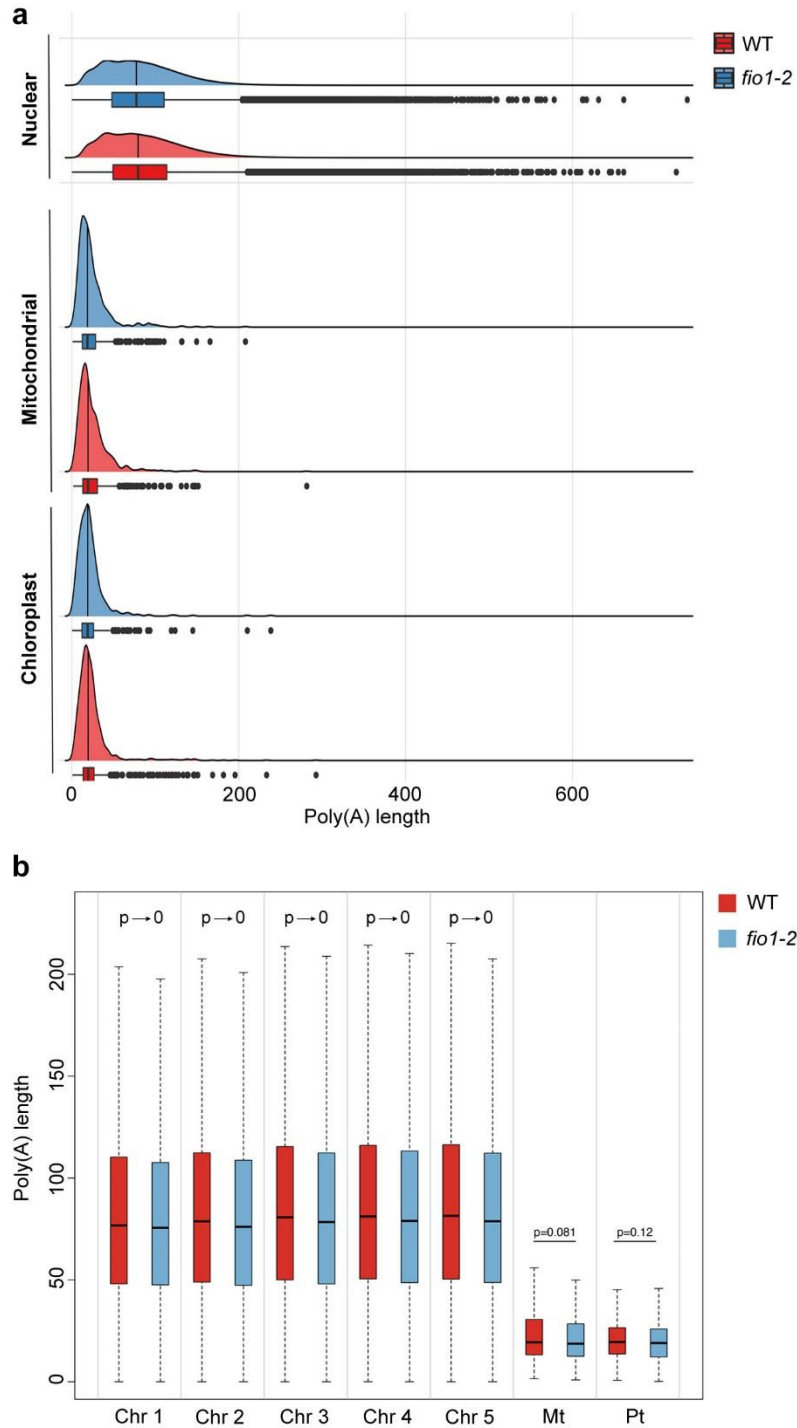

**Figure S11.** Analysis of poly(A) tail length in wild-type and *fio1-2* plants with nanopore reads. a) Distribution of poly(A) tail lengths of the nuclear-, mitochondrial- and chloroplast-encoded transcripts in wild-type and *fio1-2* plants. b) Box plot showing the poly(A) tail length of transcripts encoded by various chromosomes and mitochondrial and plastid genomes in wild-type and *fio1-2* plants. Chr, chromosome; Mt, mitochondrial; Pt, plastid.

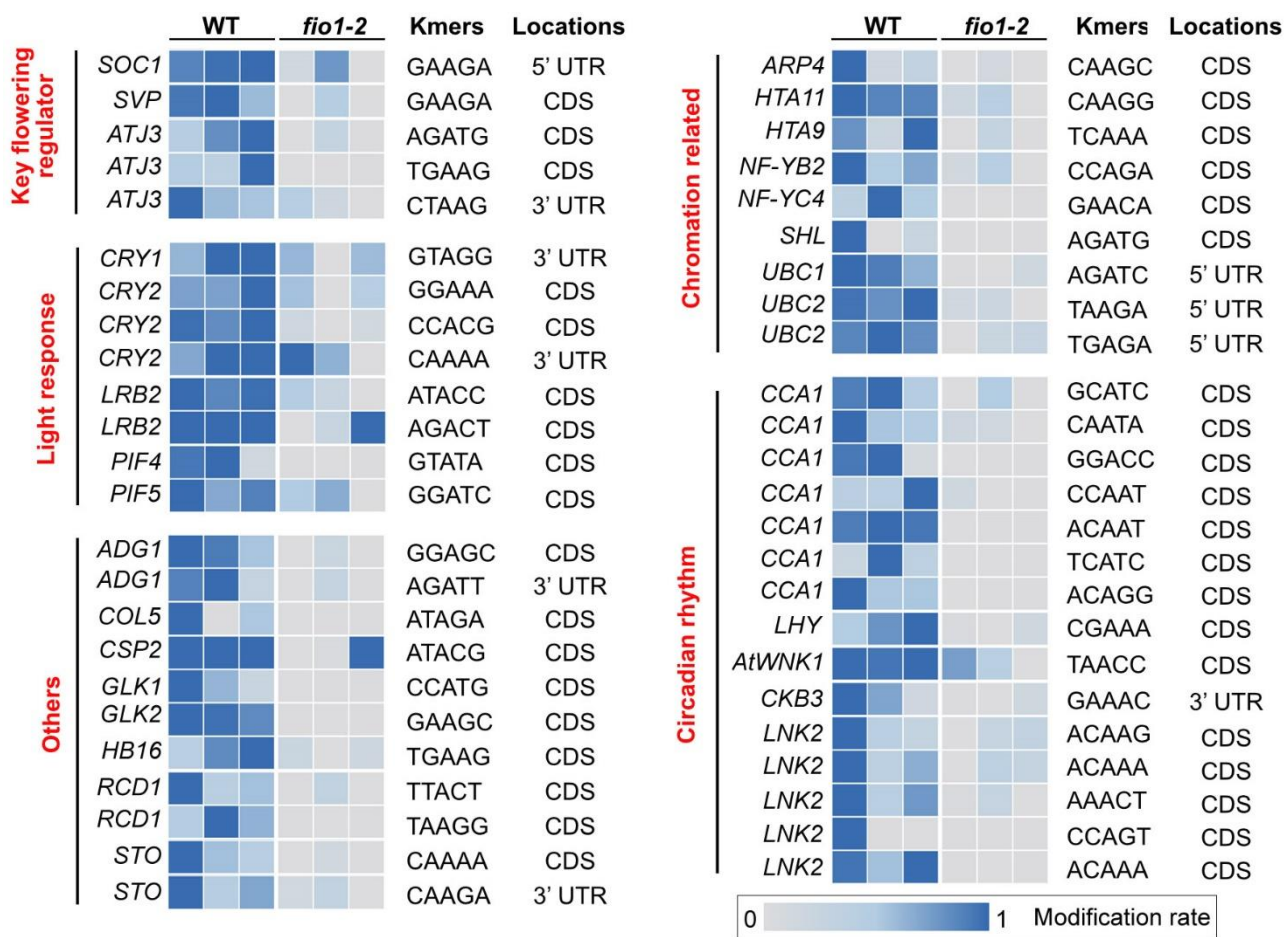

**Figure S12.** Heatmap showing the modification rates of flowering-related genes. The k-mers and positions of these hypomethylated sites are shown on the right. These genes are grouped based on their biological function in regulating flowering. *SOC1*, *SUPPRESSOR OF OVEREXPRESSION OF CONSTANS 1*; *SVP*, *SHORT VEGETATIVE PHASE*; *ARP4*, *ACTIN-RELATED PROTEIN 4*; *HTA11*, *HISTONE H2A 11*; *SHL*, *SHORT LIFE*; *NF-YB4*, *NUCLEAR FACTOR Y, SUBUNIT B4*; *UBC1*, *UBIQUITIN-CONJUGATING ENZYME 1*; *CCA1*, *CIRCADIAN CLOCK ASSOCIATED 1*; *LHY*, *LATE ELONGATED HYPOCOTYL*; *AtWNK1*, *ARABIDOPSIS THALIANA WITH NO LYSINE (K) KINASE 1*; *CKB3*, *CASEIN KINASE II BETA CHAIN 3*; *LNK2*; *NIGHT LIGHT-INDUCIBLE AND CLOCK-REGULATED GENE 2*; *CRY1*, *CRYPTOCHROME 1*; *LRB2*, *LIGHT-RESPONSE BTB 2*; *PIF4*, *PHYTOCHROME INTERACTING FACTOR 4*; *ADG1*, *ADP GLUCOSE PYROPHOSPHORYLASE 1*; *COL5*, *CONSTANS-LIKE 5*; *CSP2*, *COLD SHOCK PROTEIN 2*; *GLK1*, *GOLDEN2-LIKE 1*; *HB16*, *HOMEBOX PROTEIN 16*; *RCD1*, *RADICAL-INDUCED CELL DEATH1*; *STO*, *SALT TOLERANCE*.

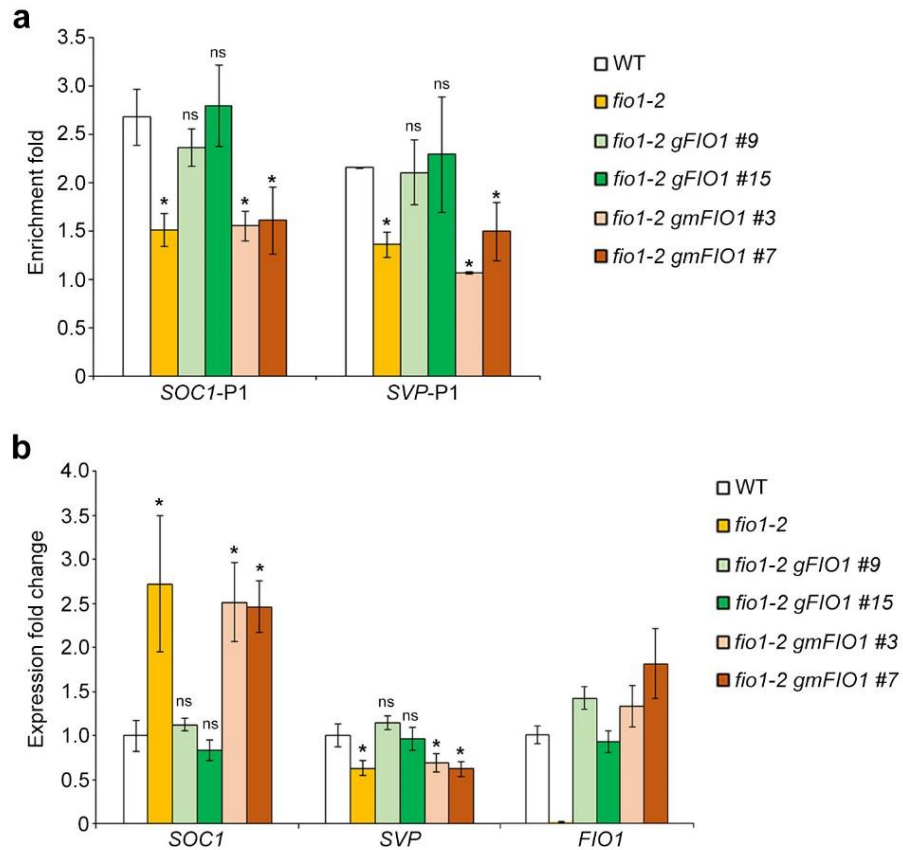

**Figure S13.** Analysis of m<sup>6</sup>A enrichment and expression of *SOCI* and *SVP* in *fio1-2 gFIO* and *fio1-2 gmFIO1* transgenic plants. a) Analysis of m<sup>6</sup>A enrichment on *SOCI* and *SVP* transcripts in various genetic background. m<sup>6</sup>A-IP-qPCR was performed with 6-day-old seedlings in different genetic backgrounds under LDs. Error bars, mean  $\pm$  SD; n = 3 biological replicates. Asterisks or ns indicate statistically significant differences or no statistical difference in m<sup>6</sup>A enrichment levels between the indicated genotypes and wild-type seedlings (two-tailed paired Student's *t*-test, \* $P$  < 0.05; ns,  $P$  > 0.05). b) Quantitative analysis of expression levels of *SOCI*, *SVP*, and *FIO1* in various genetic backgrounds. Six-day-old seedlings grown under LDs were harvested for expression analysis. The expression levels were normalized to *TUB2* expression and then normalized to the expression level of each gene in wild-type set as 1.0. Error bars, mean  $\pm$  SD; n = 3 biological replicates. Asterisks or ns indicate statistically significant differences or no statistical difference in expression levels between the indicated genotypes and wild-type seedlings (two-tailed paired Student's *t*-test, \* $P$  < 0.05; ns,  $P$  > 0.05).

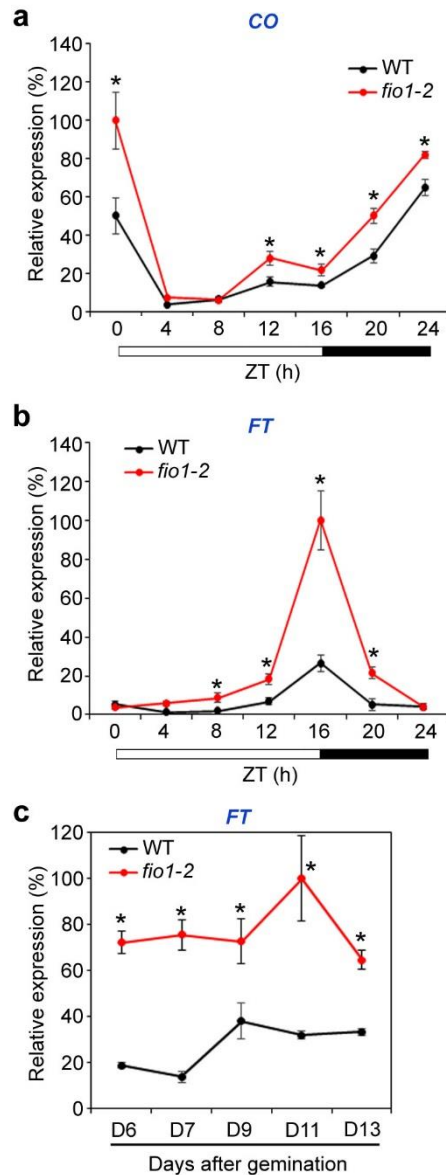

**Figure S14.** Expression of *CO* and *FT* in *fio1-2* mutants. a,b) Diurnal oscillation of *CO* (a) and *FT* (b) expression determined by real-time PCR in 6-day-old wild-type and *fio1-2* seedlings under LDs. Gene expression levels were normalized to *TUB2* expression, and the maximal expression level in each panel was set as 100%. Error bars, mean  $\pm$  SD; n = 3. c) Temporal expression of *FT* determined by real-time PCR in developing wild-type and *fio1-2* seedlings under LDs. Gene expression levels were normalized to *TUB2* expression with the maximal expression level set as 100%. Error bars, mean  $\pm$  SD; n = 3. Asterisks in (a-c) indicate significant differences between *fio1-2* and wild-type seedlings (two-tailed paired Student's *t*-test,  $P < 0.05$ ).



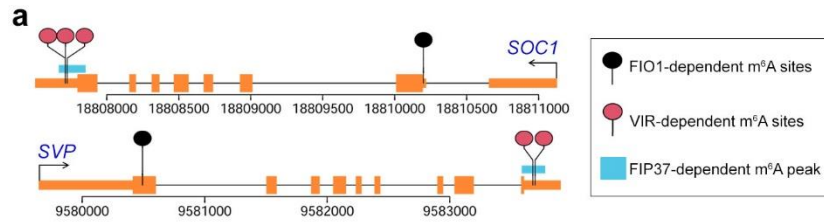

*fip37-4 LEC1:FIP37* vs. WT (5-day-old seedlings)

| Gene        | Position          | Location | m <sup>6</sup> A enrichment fold |                           |
|-------------|-------------------|----------|----------------------------------|---------------------------|
|             |                   |          | WT                               | <i>fip37-4 LEC1:FIP37</i> |
| <i>SOC1</i> | 18807668-18807854 | 3' UTR   | 8.46305                          | not detected              |
| <i>SVP</i>  | 9583591-9583777   | 3' UTR   | 7.03386                          | not detected              |

*vir-1* vs. *VIR*-complemented line (2-week-old seedlings)

| Gene        | Position | Location | m <sup>6</sup> A relative level |              |
|-------------|----------|----------|---------------------------------|--------------|
|             |          |          | <i>VIR</i> -complemented line   | <i>vir-1</i> |
| <i>SOC1</i> | 18807712 | 3' UTR   | 1.0                             | 0.36349      |
|             | 18807713 | 3' UTR   | 1.0                             | 0.66896      |
|             | 18807725 | 3' UTR   | 1.0                             | 0.09278      |
| <i>SVP</i>  | 9583678  | 3' UTR   | 1.0                             | 0.26609      |
|             | 9583697  | 3' UTR   | 1.0                             | 0.16724      |

*fio1-2* vs. WT (6-day-old seedlings)

| Gene        | Position | Location           | m <sup>6</sup> A relative level |               |
|-------------|----------|--------------------|---------------------------------|---------------|
|             |          |                    | WT                              | <i>fio1-2</i> |
| <i>SOC1</i> | 18810200 | 5'UTR/CDS junction | 1.0                             | 0.32718       |
| <i>SVP</i>  | 9580492  | CDS                | 1.0                             | 0.18085       |

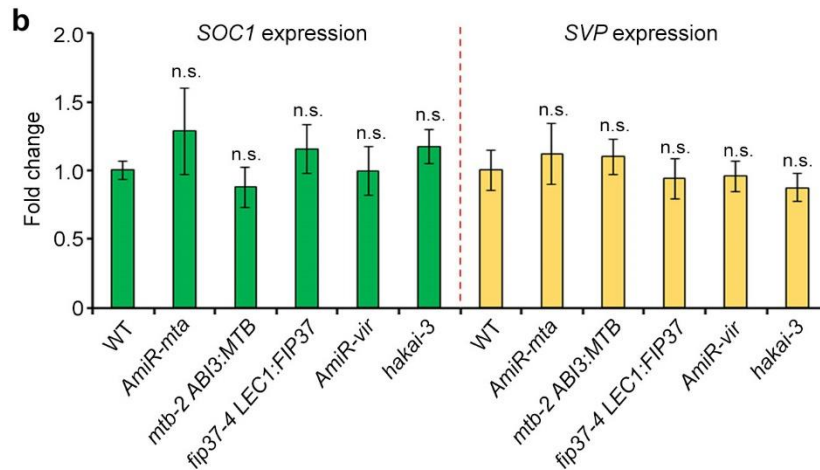

**Figure S15.** FIO1-mediated m<sup>6</sup>A methylation modulates *SOC1* and *SVP* expression independently of other known m<sup>6</sup>A writers. a) m<sup>6</sup>A modification of *SOC1* and *SVP* affected by various m<sup>6</sup>A writers. Schematic diagrams in the upper panels show the positions of FIO1-dependent m<sup>6</sup>A sites, VIR-dependent m<sup>6</sup>A sites and FIP37-dependent m<sup>6</sup>A peak in *SOC1* and *SVP* transcripts. Thick and thin orange boxes represent exons and UTRs, respectively, and black lines represent introns. The following tables show the m<sup>6</sup>A enrichment fold of *SOC1* and *SVP* in wild-type vs. *fip37-4 LEC1:FIP37* plants, and the m<sup>6</sup>A relative levels of *SOC1* and *SVP* in *VIR*-complemented lines (*VIR::GFP-VIR*) vs. *vir-1* and wild-type vs. *fio1-2* plants. The m<sup>6</sup>A-seq data

using 5-day-old wild-type and *fip37-4 LEC1:FIP37* seedlings<sup>[13]</sup> and the nanopore direct RNA sequencing data obtained from 2-week-old *VIR*-complemented line and *vir-1* seedlings<sup>[9]</sup> as well as 6-day-old wild-type and *fio1-2* seedlings in this study were used for the comparison. For nanopore sequencing data, the m<sup>6</sup>A levels in *VIR*-complemented lines or wild-type plants were set as 1.0. b) Quantitative real-time PCR analysis of *SOC1* and *SVP* expression in 6-day-old seedlings in different genotypes. *AmiR-mta* and *fip37-4 LEC1:FIP37* were previously reported.<sup>[13]</sup> *mtb-2 ABI3:MTB* was generated by complementing the embryo lethality of *mtb-2* (CS850592) with the *ABI3:MTB* transgene, in which *MTB* was driven by the embryo-specific promoter of *ABA INSENSITIVE 3 (ABI3)*. The knockdown line *AmiR-vir* was generated by artificial microRNA (AmiR) interference, while *hakai-3* containing a 1-bp of guanine (G) deletion was generated by CRISPR/Cas9-mediated gene editing of the first exon of *HAKAI*. Results were normalized against the expression levels of *TUB2*, and the values in wild-type plants were set as 1.0. Error bars, mean  $\pm$  SD; n = 3 biological replicates. n.s. indicate no significant difference between wild-type and other plants (two-tailed paired Student's *t* test,  $P > 0.05$ ).





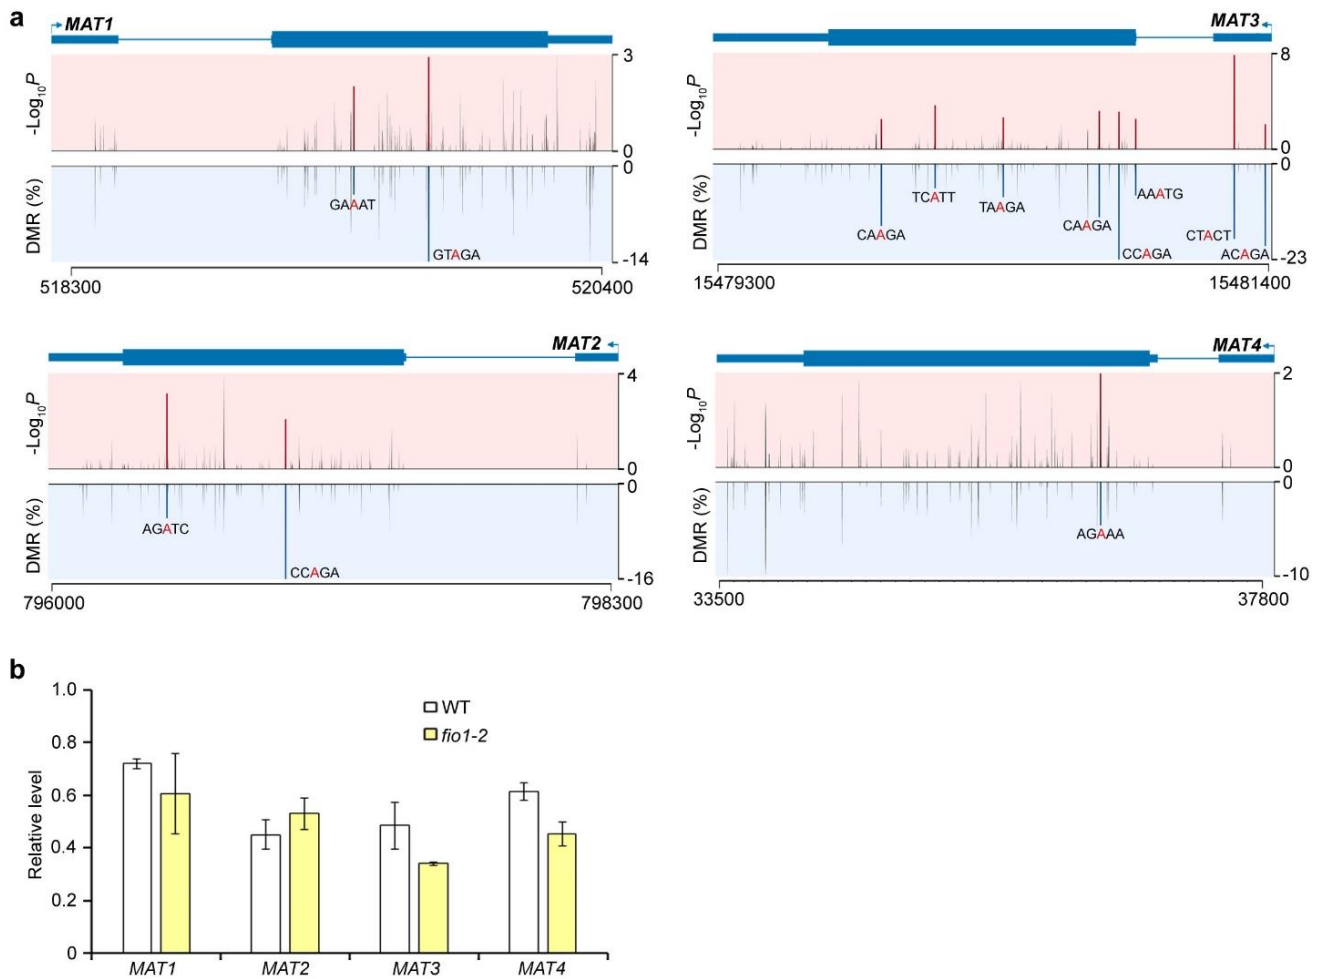

**Figure S18.** *MAT1-4* transcripts contain hypomethylated sites in *fio1-2*. a) Diagrams showing the DMRs, corresponding  $P$  values and the transcript sequences with identified  $m^6A$  sites of *MAT1-4* genes. The transcript structures are shown above. Thick and thin boxes represent exons and UTRs, respectively, while lines represent introns. b) Expression of *MAT1-4* in 6-day-old wild-type and *fio1-2* seedlings under LDs determined by real-time PCR. Error bars, mean  $\pm$  SD;  $n = 3$  biological replicates.
